# Supplementary material
Source: PubMed Central journal article supplement (PMC6233632)

## Supplementary Online Content

Xie DX, Dedmon MM, O'Connell BP, et al. Evaluation of social media presence of otolaryngology residency programs in the United States. *JAMA Otolaryngol Head Neck Surg*. Published online August 23, 2018. doi:10.1001/jamaoto.2018.1447

**eFigure 1.** Facebook Usage and Popularity Among Otolaryngology Residency Programs Stratified by Program Quartile Based on Doximity Reputation Ranking

**eFigure 2.** Twitter Usage and Popularity Among Otolaryngology Residency Programs Stratified by Program Quartile Based on Doximity Reputation Ranking

**eFigure 3.** Facebook Usage and Popularity Among Otolaryngology Residency Programs Stratified by U.S. News & World Report Ranking

**eFigure 4.** Twitter Usage and Popularity Among Otolaryngology Residency Programs Stratified by U.S. News & World Report Ranking

This supplementary material has been provided by the authors to give readers additional information about their work.

eFigure 1. Facebook Usage and Popularity Among Otolaryngology Residency Programs Stratified by Program Quartile Based on Doximity Reputation Ranking. (A) Number of posts in prior six months, (B) followers, and (C) likes.

**A** Mean Number of Posts in Prior 6 Months Among Programs with Facebook Profiles

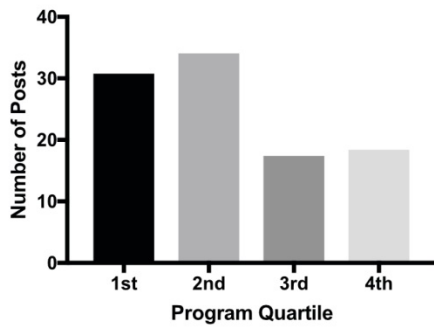

**B** Mean Number of Followers Among Programs with Facebook Profiles

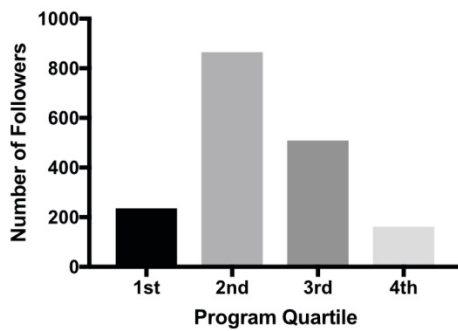

**C** Mean Number of Likes Among Programs with Facebook Profiles

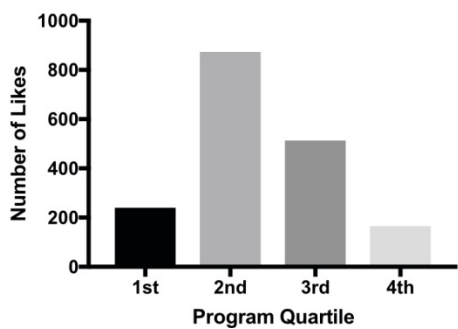

eFigure 2. Twitter Usage and Popularity Among Otolaryngology Residency Programs Stratified by Program Quartile Based on Doximity Reputation Ranking. (A) Total tweets, (B) tweets in prior six months, (C) followers, (D) likes, and (E) accounts followed.

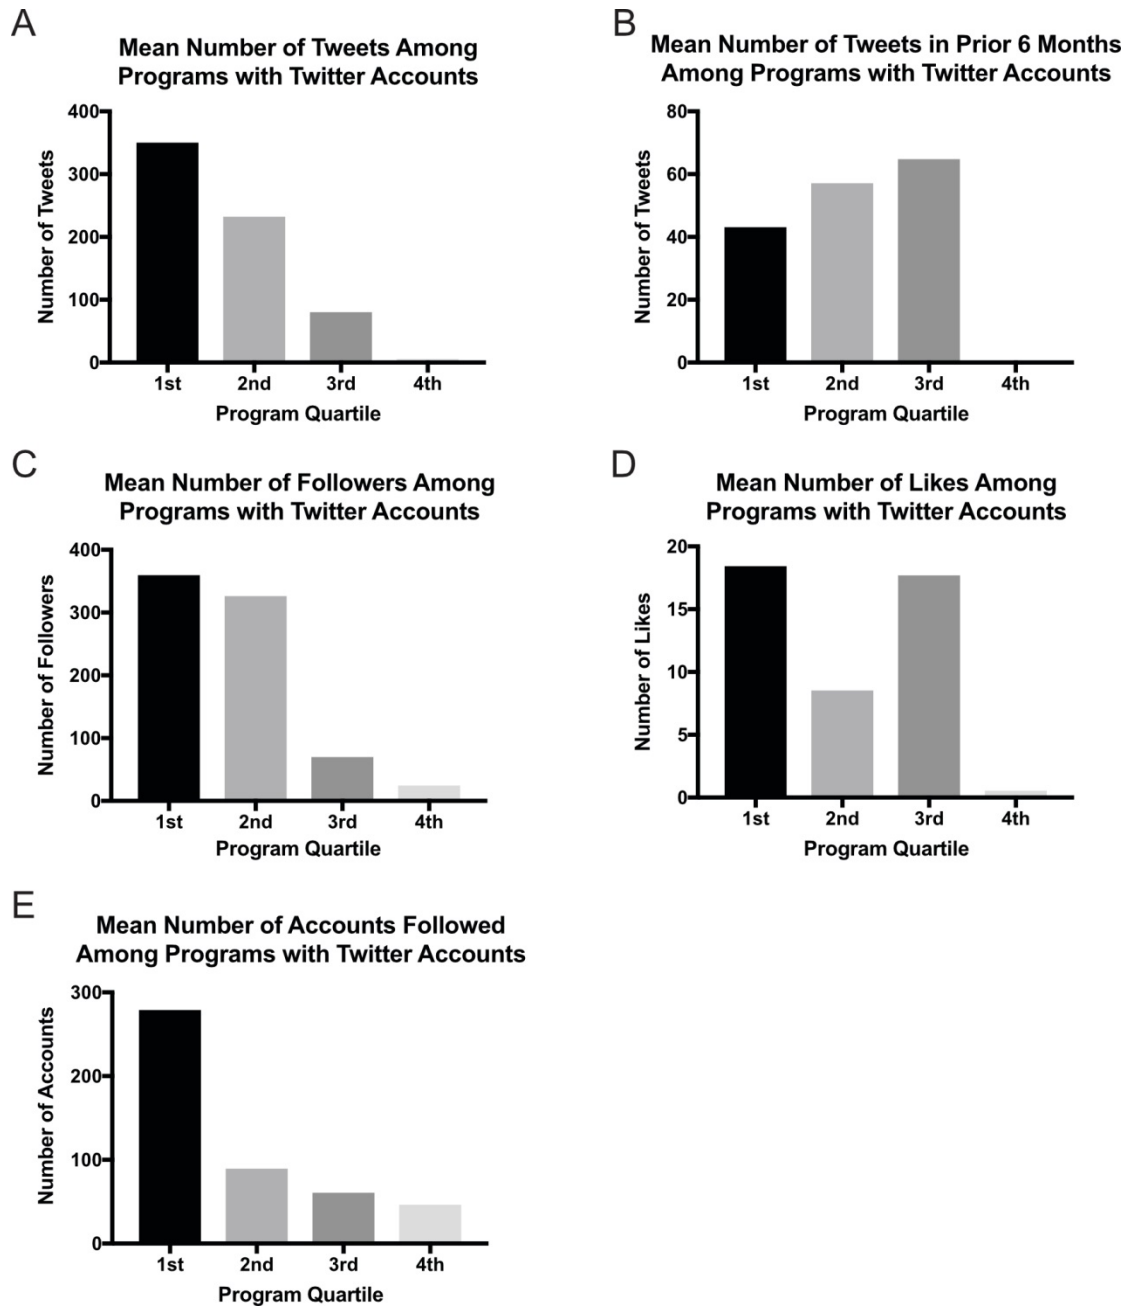

**eFigure 3.** Facebook Usage and Popularity Among Otolaryngology Residency Programs Stratified by U.S. News & World Report Ranking. (A) Number of posts in prior six months, (B) followers, and (C) likes.

**A Mean Number of Posts in Prior 6 Months Among Programs with Facebook Profiles**

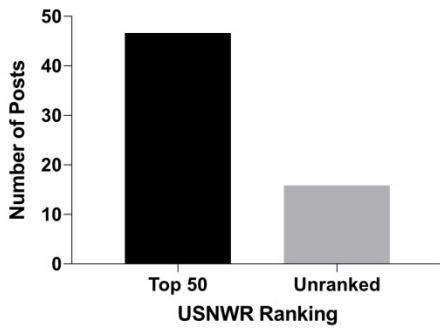

**B Mean Number of Followers Among Programs with Facebook Profiles**

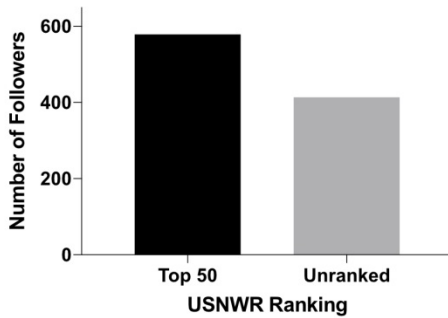

**C Mean Number of Likes Among Programs with Facebook Profiles**

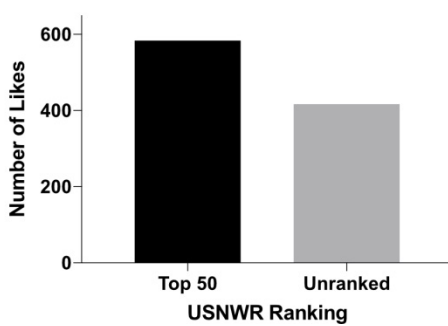

eFigure 4. Twitter Usage and Popularity Among Otolaryngology Residency Programs Stratified by U.S. News & World Report Ranking. (A) Total tweets, (B) tweets in prior six months, (C) followers, (D) likes, and (E) accounts followed.

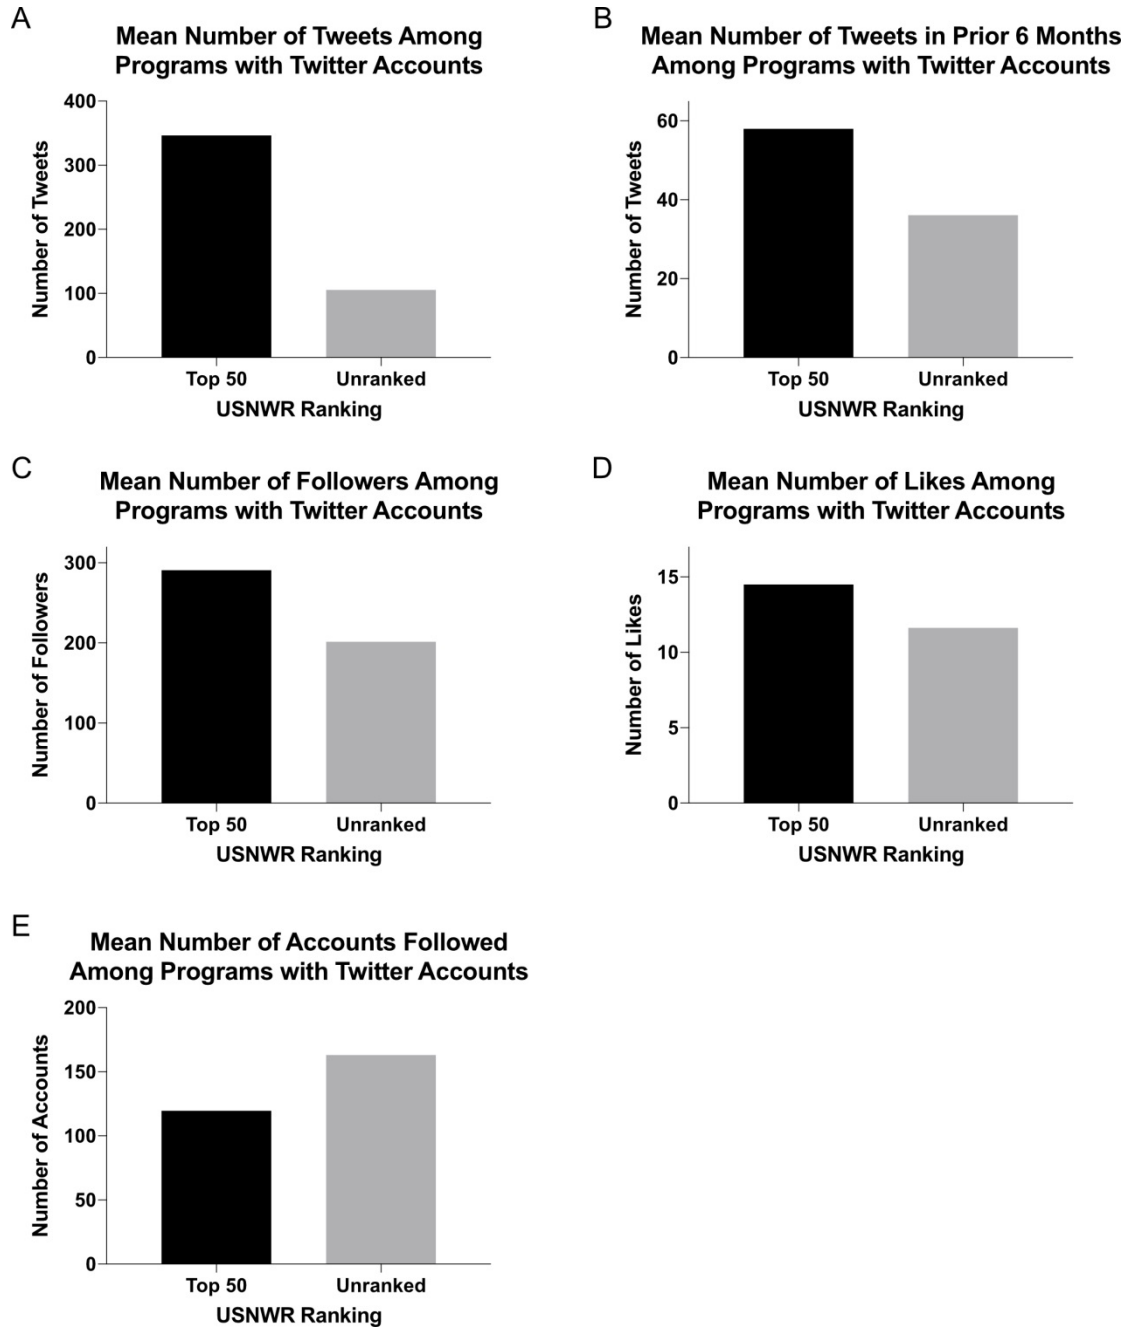

Supplement: jamaotolaryngolheadnecksurg-144-802-s001.pdf [file jamaotolaryngolheadnecksurg-144-802-s001.pdf]
